# Supplementary material for: The Ability of the Yeast Wickerhamomyces anomalus to Hydrolyze Immunogenic Wheat Gliadin Proteins
Source: Foods. 2022 Dec 19;11(24):4105. doi: 10.3390/foods11244105 (PMC9778486; doi:10.3390/foods11244105)
Supplement: Supplementary file 1 [file foods-11-04105-s001.zip › foods-2089300-supplementary.pdf]

## Supplementary materials

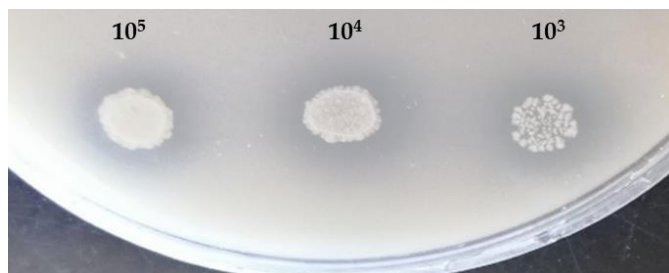

**Figure S1.** *W. anomalous* ME1 strain's ability to hydrolyze wheat gliadin proteins on solid medium SM with glucose (2% w/v) and ammonium sulfate (5% w/v) as carbon and nitrogen sources, respectively, and gliadins (0.5% v/v).

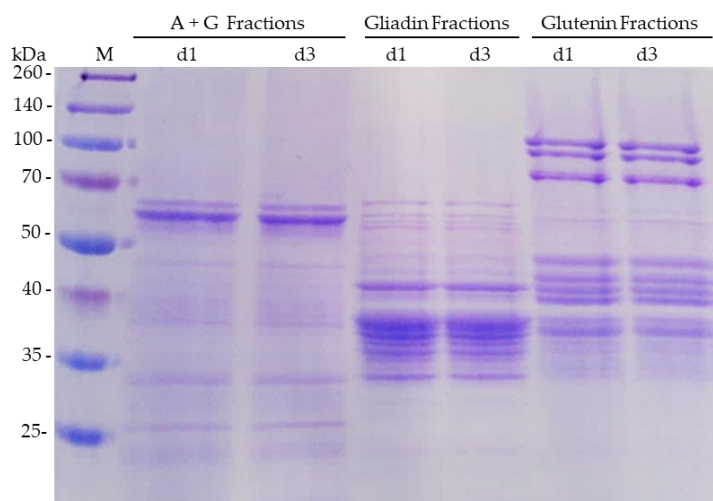

**Figure S2. Validation of the method used to obtain gliadin proteins.** The procedure described in Section 2.2 was applied to 3 samples of V-25 bakery wheat flour. One flour sample was processed per day. The protein fractions obtained on days 1 (d1) and 3 (d3) were resolved by SDS-PAGE (8  $\mu$ L) and the protein profiles were compared. The gliadin protein fraction extracted with ethanol/water (60/40 v/v) was obtained after subtracting from the flour samples the albumin and globulin proteins (A+G fraction) with a salt solution. Glutenin proteins

extracted from the gliadin-free sediment with propanol-urea-DTT are also shown. M, protein mixture (25–260 kDa) used as the molecular weight marker.

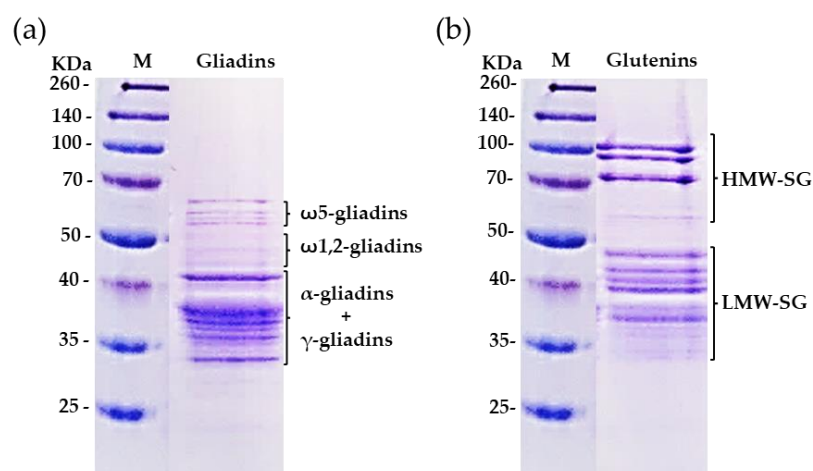

**Figure S3. Gluten proteins of V-25 wheat flour.** The bands belonging to the different types of gliadin (a) and glutenin (b) proteins were inferred from electrophoretic mobility pattern and molecular weights ( $M_r$ ), according to those described for wheat flour samples in other works [3].  $M_r$  ranges:  $\omega$ 5-gliadins 60–68 kDa;  $\omega$ 1,2-gliadins 43–60 kDa;  $\alpha$ - and  $\gamma$ -gliadins 32–45 Da; HMW-GS (high-molecular-weight-glutenin subunits) 80–120 kDa; LMW-GS (low-molecular-weight-glutenin subunits) 32–45 kDa. M, protein mixture used as  $M_r$  marker.

**Table S1. Quantification of gliadin proteins in wheat flour fermentation** from the bands identified by polyclonal antigliadin antibodies.

| Sample             | Fermentation time (hours) | Intensity of all bands (arbitrary units) per experiment (Exp) |            |            | Gliadin hydrolysis percentage per experiment (Exp) |       |       | Hydrolysis percentage average | Standard deviation (±) |
|--------------------|---------------------------|---------------------------------------------------------------|------------|------------|----------------------------------------------------|-------|-------|-------------------------------|------------------------|
|                    |                           | Exp 1                                                         | Exp 2      | Exp 3      | Exp 1                                              | Exp 2 | Exp 3 |                               |                        |
| Sc-fermented dough | 0                         | 39354795.0                                                    | 37254873.0 | 38456213.0 | 0.0                                                | 0.0   | 0.0   | 0.0                           | 0.0                    |
| Sc-fermented dough | 24                        | 39651672.0                                                    | 38131462.0 | 38651321.0 | 0.8                                                | 2.4   | 0.5   | 1.2                           | 1.0                    |
| Sc-fermented dough | 48                        | 38873034.0                                                    | 37913032.0 | 38073045.0 | 1.0                                                | 1.8   | 1.0   | 1.3                           | 0.4                    |
| Wa-fermented dough | 0                         | 38959146.0                                                    | 38052346.0 | 38501571.0 | 0.0                                                | 0.0   | 0.0   | 0.0                           | 0.0                    |
| Wa-fermented dough | 24                        | 19748473.0                                                    | 19026173.0 | 18250785.5 | 49.3                                               | 50.0  | 52.6  | 50.6                          | 1.7                    |
| Wa-fermented dough | 48                        | 19535562.0                                                    | 19615581.0 | 19050643.0 | 49.9                                               | 48.5  | 50.5  | 49.6                          | 1.1                    |

Sc, *Héracles* baker's yeast; Wa, the *Wickerhamomyces anomalus* yeast strain ME1

**Table S2. Quantification of gliadin proteins in bread making** from the bands identified by the monoclonal anti- $\alpha$ -gliadin antibody [14D5] (ab367299).

| Sample             | Fermentation time (hours) | Intensity of all bands (arbitrary units) per experiment (Exp) |           |           | Gliadin hydrolysis percentage per experiment (Exp) |       |       | Hydrolysis percentage average | Standard deviation (±) |
|--------------------|---------------------------|---------------------------------------------------------------|-----------|-----------|----------------------------------------------------|-------|-------|-------------------------------|------------------------|
|                    |                           | Exp 1                                                         | Exp 2     | Exp 3     | Exp 1                                              | Exp 2 | Exp 3 |                               |                        |
| Uninoculated dough | 24                        | 2593188.0                                                     | 2194236.0 | 1994760.0 | 0.0                                                | 0.0   | 0.0   | 0.0                           | 0.0                    |
| Bread control      |                           | 1366794.0                                                     | 1739556.0 | 1242540.0 | 37.7                                               | 20.7  | 47.3  | 35.2                          | 13.5                   |
| Sc-fermented dough | 0                         | 2776971.2                                                     | 2598633.6 | 2547680.0 | 0.0                                                | 0.0   | 0.0   | 0.0                           | 0.0                    |
| Sc-fermented dough | 24                        | 2710476.4                                                     | 2710476.4 | 2683640.0 | 5.3                                                | 4.3   | 2.4   | 4.0                           | 1.5                    |
| Sc-made bread      |                           | 1275716.0                                                     | 1177584.0 | 981320.0  | 61.4                                               | 54.7  | 54.1  | 56.7                          | 4.1                    |
| Wa-fermented dough | 0                         | 2655180.0                                                     | 2413800.0 | 2413800.0 | 0.0                                                | 0.0   | 0.0   | 0.0                           | 0.0                    |
| Wa-fermented dough | 24                        | 1368640.0                                                     | 1263360.0 | 1052800.0 | 56.3                                               | 47.7  | 48.5  | 50.8                          | 4.8                    |
| Wa-made bread      |                           | 640360.0                                                      | 548880.0  | 457400.0  | 81.0                                               | 77.23 | 75.8  | 78.1                          | 2.7                    |

Sc, *Héracles* baker's yeast; Wa, the *Wickerhamomyces anomalus* yeast strain ME1
